1           **Accurate forecasts of the effectiveness of interventions against Ebola may**  
2           **require models that account for variations in symptoms during infection**

3  
4           **AUTHORS**

5           W.S. Hart<sup>1</sup>, L.F.R. Hochfilzer<sup>1</sup>, N.J. Cunniffe<sup>2</sup>, H. Lee<sup>3</sup>, H. Nishiura<sup>3</sup>, R.N. Thompson<sup>1,4,5,\*</sup>

6  
7           \*Correspondence to: [robin.thompson@chch.ox.ac.uk](mailto:robin.thompson@chch.ox.ac.uk)

8  
9           **AFFILIATIONS**

10          <sup>1</sup>Mathematical Institute, University of Oxford, Andrew Wiles Building, Radcliffe  
11          Observatory Quarter, Woodstock Road, Oxford OX2 6GG, UK

12          <sup>2</sup>Department of Plant Sciences, University of Cambridge, Downing Street, Cambridge  
13          CB2 3EA, UK

14          <sup>3</sup>Graduate School of Medicine, Hokkaido University, Hokkaido, Japan

15          <sup>4</sup>Department of Zoology, University of Oxford, South Parks Road, Oxford OX1 3PS, UK

16          <sup>5</sup>Christ Church, University of Oxford, St Aldates, Oxford OX1 1DP, UK

17  
18          **ABSTRACT**

19  
20          Epidemiological models are routinely used to predict the effects of interventions aimed at  
21          reducing the impacts of Ebola epidemics. Most models of interventions targeting  
22          symptomatic hosts, such as isolation or treatment, assume that all symptomatic hosts are  
23          equally likely to be detected. In other words, following an incubation period, the level of  
24          symptoms displayed by an individual host is assumed to remain constant throughout an  
25          infection. In reality, however, symptoms vary between different stages of infection. During  
26          an Ebola infection, individuals progress from initial non-specific symptoms through to  
27          more severe phases of infection. Here we compare predictions of a model in which a  
28          constant symptoms level is assumed to those generated by a more epidemiologically  
29          realistic model that accounts for varying symptoms during infection. Both models can  
30          reproduce observed epidemic data, as we show by fitting the models to data from the  
31          ongoing epidemic in the Democratic Republic of Congo and the 2014-16 epidemic in

32 Liberia. However, for both of these epidemics, when interventions are altered identically  
33 in the models with and without levels of symptoms that depend on the time since first  
34 infection, predictions from the models differ. Our work highlights the need to consider  
35 whether or not varying symptoms should be accounted for in models used by decision  
36 makers to assess the likely efficacy of Ebola interventions.

37

## 38 **KEYWORDS**

39 Ebola virus disease; Mathematical modelling; Epidemic forecasting; Infectious disease  
40 management; Disease control; Interventions

41

42

## 1. INTRODUCTION

43

44 Ebola epidemics have devastating consequences. The current epidemic in the  
45 Democratic Republic of Congo is the second largest in history, with 663 cases (614  
46 confirmed and 49 probable) having been recorded as of 15<sup>th</sup> January 2019 [1].

47 Mathematical models are increasingly used for exploring the effects of different possible  
48 control interventions during Ebola epidemics [2–4]. The values of model parameters are  
49 chosen so that the model output matches observed epidemic data (model fitting; Fig  
50 1A), and then interventions are introduced in the fitted model to predict how the course  
51 of the epidemic is altered by different possible control strategies (intervention testing;  
52 Fig 1B).

53

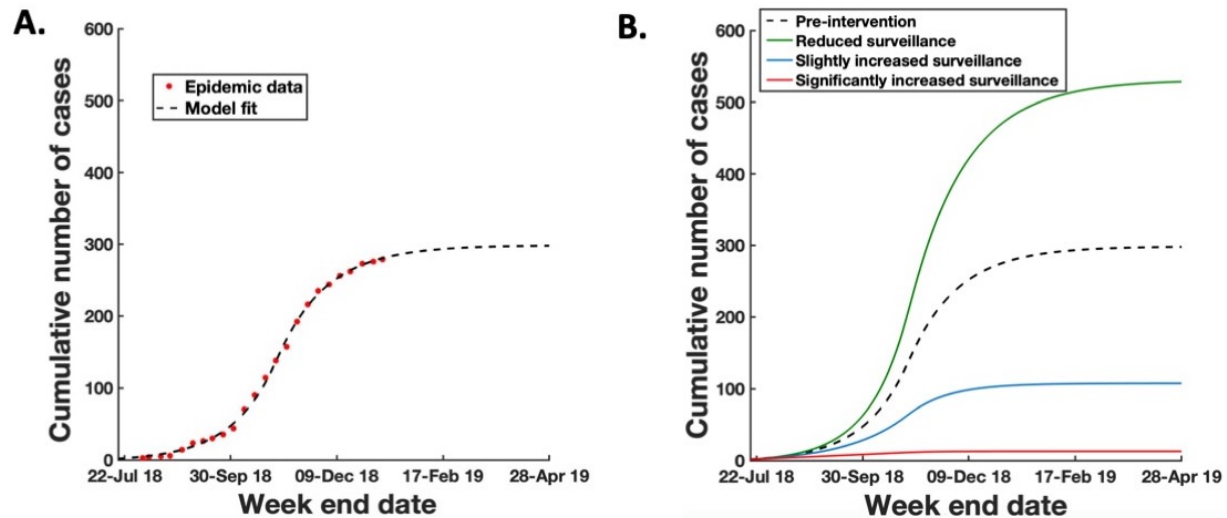

54

55 Figure 1. Schematic showing how a model can be used to predict the effect of changing control interventions  
56 on epidemic dynamics. Here, an intensification of surveillance is assumed to lead to improved detection  
57 and control of infectious hosts, thereby reducing the total number of cases. A. Model fitting. Model  
58 parameters are chosen so that the model output (black dotted) approximates epidemic data (red stars) B.  
59 Intervention testing. A range of alternative control interventions are introduced into the fitted model, and  
60 predicted dynamics under these new control interventions can be observed – predictions of the effects of  
61 reduced surveillance (green), slightly intensified surveillance (blue) and significantly intensified surveillance  
62 (red).

63

64

65 A commonly used model for characterising epidemics of diseases including Ebola is the  
66 Susceptible-Exposed-Infectious-Recovered (SEIR) model [5–7], and extensions to this  
67 basic model include explicit incorporation of transmission from Ebola deceased hosts [8–  
68 10] or accounting for mismatches between symptoms and infectiousness [11,12].  
69 Possible interventions include isolation of symptomatic hosts, which can be included in  
70 the SEIR model by removing individuals from the infectious class. All individuals in the  
71 infectious class are usually assumed to be symptomatic, with the level of symptoms being  
72 assumed constant and therefore independent of the stage of infection. As an example,  
73 Chowell *et al.* [13] assume that symptomatic individuals are isolated at a constant rate,  
74 and Meakin *et al.* [4] assume that symptomatic individuals are hospitalised at a constant  
75 rate.

76

77 However, in reality, it is not the case that all symptomatic hosts are equally  
78 symptomatic. During an Ebola infection, an infected host progresses through different  
79 stages [14] – from initial non-specific symptoms (fever, headache and myalgia) to a  
80 gastrointestinal phase (diarrhoea, vomiting, abdominal symptoms and dehydration), and  
81 then either to a deterioration phase (collapse, neurological manifestations and bleeding)  
82 or recovery. Individuals with non-specific symptoms are less likely to be observed and  
83 treated/isolated than individuals who have progressed further through infection and  
84 have developed more specific and more serious symptoms.

85  
86 Here, we investigate whether explicitly accounting for variations in symptom expression  
87 during the course of an Ebola infection leads to different epidemiological model  
88 dynamics compared to assuming a constant level of symptoms. To do this, we compare  
89 predictions derived from a model in which infectious hosts have a constant level of  
90 symptoms (the constant symptoms model – see Methods) with those from a model in  
91 which variable symptoms during infection are accounted for (the variable symptoms  
92 model). We parameterise our models using data from the ongoing Ebola epidemic in the  
93 Democratic Republic of Congo. We find that both models can be fitted closely to data  
94 from the epidemic. However, when control interventions in the models are altered, for  
95 example to explore the effects of intensifying surveillance and control, forecasts  
96 generated by the models are very different. We find the same qualitative result when we  
97 instead parameterise our models using data from the largest Ebola epidemic in history:  
98 the 2014-16 epidemic in west Africa.

99  
100 These analyses demonstrate that models with or without variable symptoms can  
101 reproduce observed disease incidence time series, but that predictions from the models  
102 are different when interventions are altered, even when the change in interventions is  
103 identical in both models. Our results highlight the need to consider whether variations in  
104 symptom expression during infection should be included in models of Ebola epidemics.  
105 Without accounting for variable symptoms, predictions of the possible effects of  
106 interventions may be incorrect.

107

108

## 2. METHODS

109

### 110 *Datasets*

111

112 To show that our results are not conditioned on particular properties of data from a  
113 single epidemic, we conducted two separate analyses in which we considered data from  
114 two different Ebola epidemics.

115

116 In the first analysis, we used data on the numbers of cases in approximately weekly  
117 time intervals from the ongoing Ebola epidemic in the Democratic Republic of Congo. It  
118 has recently been suggested by Dr Peter Salama, Deputy Director-General of  
119 Emergency Preparedness and Response at the World Health Organization, that this  
120 epidemic comprises several distinct outbreaks in different affected areas. Indeed,  
121 disease incidence time series display distinct phases (large numbers of cases at the  
122 end of July/beginning of August 2018, followed by low numbers of cases in September,  
123 and then larger numbers of cases again thereafter), probably due to spatial effects of  
124 spread of the virus which are not captured by standard non-spatial compartmental  
125 models [15]. For this reason, we focussed on data from the health zone of Beni, a city in  
126 the north-east of the Democratic Republic of Congo, and the neighbouring health zone  
127 of Kalunguta. This region has been severely impacted by the current epidemic. These  
128 data were obtained from World Health Organization disease outbreak news reports from  
129 4<sup>th</sup> August 2018 to 10<sup>th</sup> January 2019 (Data S1, see also [16]).

130

131 In the second analysis, we considered data comprising of the numbers of cases in  
132 approximately weekly time intervals in Liberia during the 2014-16 Ebola epidemic, which  
133 were obtained from the World Health Organization (Data S2, see also [17]).

134

### 135 *Mathematical model*

136

137 In the commonly used SEIR model, individuals are classified according to whether they  
138 are (S)usceptible to infection, (E)xposed, (I)nfectious by the pathogen or (R)emoved and

139 no longer infectious. We extended this model to account explicitly for case finding  
140 followed by isolation of infectious individuals. We also assumed that there were three  
141 distinct phases of infection, corresponding to different stages of an Ebola infection. This  
142 delivered the additional benefit that the infectious period (in the absence of control) was  
143 gamma distributed, rather than exponentially distributed – and gamma distributions  
144 have been found to characterise epidemiological periods accurately in a range of  
145 systems [18,19]. This gave rise to the SEI<sub>1</sub>I<sub>2</sub>I<sub>3</sub>RC model,

146

$$\begin{aligned}147 \quad \frac{dS}{dt} &= -\beta(t)S(I_1 + I_2 + I_3), \\148 \quad \frac{dE}{dt} &= \beta(t)S(I_1 + I_2 + I_3) - \gamma E, \\149 \quad \frac{dI_1}{dt} &= \gamma E - \mu I_1 - \delta_1 I_1, \\150 \quad \frac{dI_2}{dt} &= \mu I_1 - \mu I_2 - \delta_2 I_2, \\151 \quad \frac{dI_3}{dt} &= \mu I_2 - \mu I_3 - \delta_3 I_3, \\152 \quad \frac{dR}{dt} &= \mu I_3, \\153 \quad \frac{dC}{dt} &= \delta_1 I_1 + \delta_2 I_2 + \delta_3 I_3.\end{aligned}$$

154

155 In this model, the *C* compartment represents the number of individuals that have ever  
156 been controlled (detected and isolated) until the current time. Since we wish to isolate  
157 the impacts on prediction of variable symptoms alone, in the baseline version of the  
158 model we assume that all infectious hosts are equally infectious – although we consider  
159 the effect of relaxing this assumption later.

160

161 In our analyses, we made the assumption widely used in Ebola models that the infection  
162 rate parameter in the model is temporally-varying [4,5], to reflect changes in  
163 transmissibility during the epidemic. This could, for example, indicate changes in  
164 behavioural responses or alterations to interventions (aside from detection and isolation,  
165 since we model that explicitly). In particular, we assumed that

166

167

$$\beta(t) = \begin{cases} \beta_0 & \text{for } t \leq T \text{ days,} \\ \beta_1 & \text{for } t > T \text{ days.} \end{cases}$$

168

169 We then considered two alternative versions of the model. In the first (the constant  
170 symptoms model – Fig 2A), we assumed that all infectious individuals are successfully  
171 detected and isolated at the same average rate per day, so that  $\delta_1 = \delta_2 = \delta_3 = \delta$ , say.  
172 This assumption is common to any epidemiological model that includes interventions  
173 aimed at symptomatic hosts, unless differences in symptom expression are accounted  
174 for explicitly. The constant symptoms model is therefore similar to most epidemiological  
175 models that have been used to represent Ebola epidemics previously (e.g. [4,13]).

176

177 We also considered the more realistic case in which symptoms become more severe as  
178 infection progresses, so that  $\delta_1 < \delta_2 < \delta_3$ . We refer to the resulting model as the  
179 variable symptoms model (Fig 2B). This model reflects the fact that, in reality,  
180 individuals with initial mild symptoms are less likely to be detected and isolated to  
181 prevent further transmission than individuals with more developed symptoms who are in  
182 the gastrointestinal or deterioration phases.

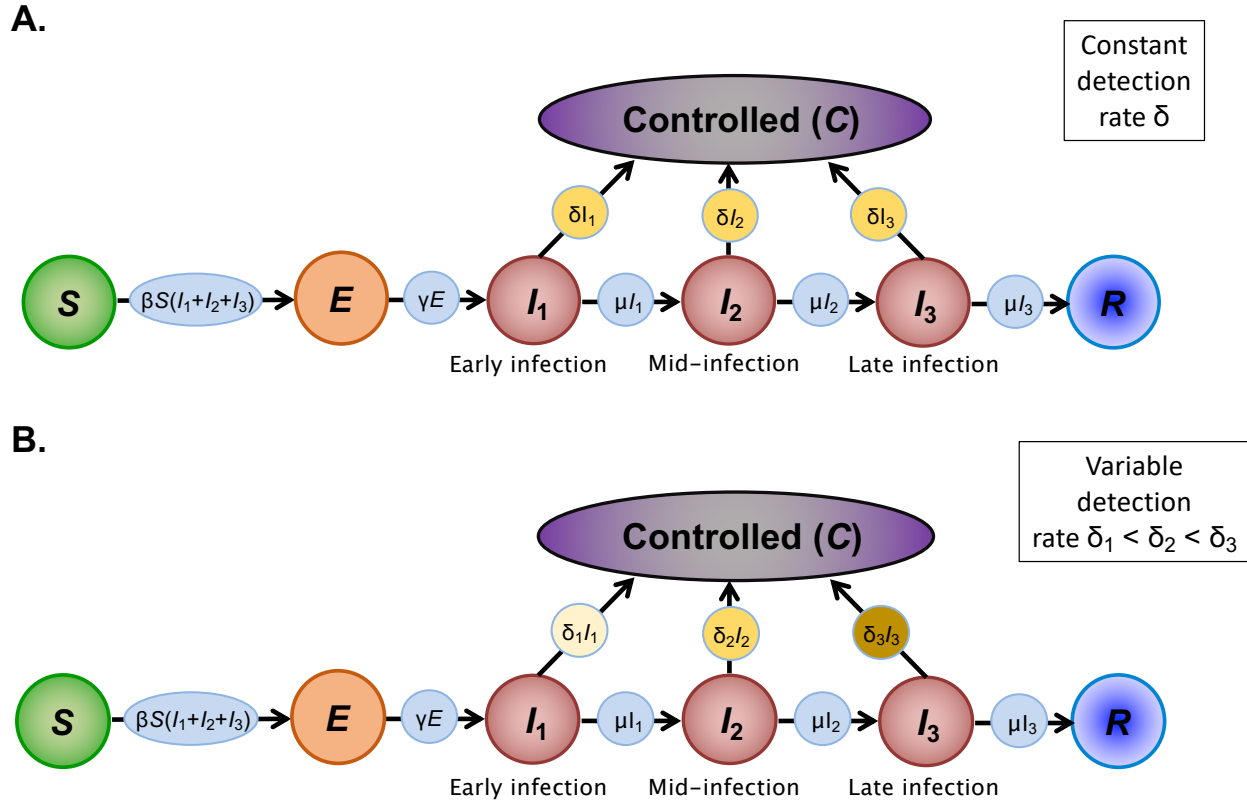

183  
 184 Figure 2. Schematic of the different models that we considered. A. Constant symptoms model, in which  
 185 individuals in each stage of infection are equally likely to be detected and isolated (so that the detection  
 186 rate,  $\delta$ , is equal for all three infectious classes); B. Variable symptoms model, in which symptoms are  
 187 assumed to intensify during an Ebola infection (so that the detection rate is smaller for individuals in earlier  
 188 infection compared to later infection, i.e.  $\delta_1 < \delta_2 < \delta_3$ ). We also show how additional epidemiological  
 189 complexity can be included in these models (see Supplementary Material).

190

### 191 *Model fitting and parameters*

192

193 We considered the numerical solutions of the models described above in a host  
 194 population of size of  $S + E + I_1 + I_2 + I_3 + R + C = N$  individuals and a basic reproduction  
 195 number at the beginning of the epidemic and in the absence of surveillance given by

$$196 \quad R_0 = \frac{3\beta_0 N}{\mu}.$$

197

198 The default parameter values used in our analyses are given in Table 1 (for the  
 199 Democratic Republic of Congo in 2018-19) and Table 2 (for Liberia in 2014-16).



200 However, as described in the Results, we also checked the robustness of our results to  
201 these particular parameter values. The values of the infection rates  $\beta_0$  and  $\beta_1$ , as well as  
202 the date on which the infection rate changes,  $T$ , were obtained by fitting the outputs of  
203 the models to the epidemic data. The start date of the epidemic,  $T_0$ , was also estimated  
204 during the fitting procedure. Model fitting was performed using least squares estimation  
205 – i.e. choosing parameter values to minimise the sum of squares distance between the  
206 cumulative numbers of detected or removed hosts in the model ( $C + R$ ) and the  
207 cumulative numbers of cases in the data. Numerical solutions were generated starting  
208 with a single host in the  $E$  compartment at the start time of the epidemic,  $T_0$ , with all  
209 other individuals susceptible.

210

211 The values of the parameters characterising the rate of Ebola detection and isolation,  
212 i.e.  $\delta_1$ ,  $\delta_2$  and  $\delta_3$ , depend on the level of surveillance, which includes various passive  
213 and active case finding strategies. We did not model explicitly the wide range of  
214 different surveillance activities that take place during an Ebola response (see  
215 Discussion). However, to provide a concrete setting in which to illustrate the principle  
216 that forecasts are different under the constant symptoms and variable symptoms  
217 models, we instead considered a simplified scenario in which each host is checked for  
218 infection on average every  $\Delta$  days. Each time monitoring occurs, there is a detection  
219 probability of  $p_i$  for individuals in class  $I_i$  (for  $i = 1, 2$ , or  $3$ ). As a result,

220

$$221 \quad \delta_i = \frac{1}{\Delta \left( \frac{1}{p_i} - \frac{1}{2} \right)}$$

222

223 This expression is derived in the Supplementary Material (for a similar approach, see  
224 also [20]).

225

226 In our main analyses, we considered two different surveillance regimes. When the  
227 models were fitted, under weak surveillance, we assumed that the default surveillance  
228 period was  $\Delta = 21$  days. When the fitted models were then used to predict the impacts  
229 of intensified surveillance, the surveillance period was changed to  $\Delta = 14$  days. We

230 assumed that the detection probability in the constant symptoms model was  $p_1 = p_2 =$   
231  $p_3 = 0.6$ . When we accounted for the possibility that symptoms change as hosts  
232 progress through infection, we instead used default values of  $p_1 = 0.1$ ,  $p_2 = 0.8$  and  
233  $p_3 = 0.9$  so that the mean value of  $p_1$ ,  $p_2$  and  $p_3$  was equal to the value of these  
234 parameters in the constant symptoms model. In other words, conditional on not being  
235 detected previously, a host chosen at a random time in the infectious period was equally  
236 likely to be detected in both models.

237

238

### 3. RESULTS

239

240 As described in the Introduction, fitted models are often used to test potential control  
241 interventions (Fig 1). We therefore considered fitting models to two different datasets –  
242 one from the current Ebola epidemic in the Democratic Republic of Congo, and another  
243 from the historical Ebola epidemic in west Africa in 2014-16.

244

245 First, we considered data from the ongoing Ebola epidemic in the Democratic Republic  
246 of Congo (Fig 3A). We fitted the constant symptoms model and variable symptoms  
247 model to these data in turn, and found that both of these models could replicate the  
248 observed dynamics of the epidemic (Figs 3B). We then used these fitted models to  
249 predict how the epidemic dynamics would have been altered under a different control  
250 intervention. In particular, we increased the rate of detection in the fitted models, to  
251 represent predictions under an intensification of surveillance and control efforts (see  
252 Methods).

253

254 When surveillance was intensified, the prediction of the constant symptoms model  
255 differed substantially from that of the variable symptoms model (Fig 3C). In particular,  
256 for the parameter values displayed here, the constant symptoms model predicted 24%  
257 fewer cases than the more epidemiologically realistic variable symptoms model (108  
258 cases in the constant symptoms model as opposed to 142 cases in the variable  
259 symptoms model). Consequently, even though the observed dynamics of the models

260 appear identical when fitted to data, they produce different predictions when control  
261 interventions are changed.

262  
263 We then repeated our analysis, instead using data from the 2014-16 Ebola epidemic in  
264 west Africa (Figs 3D-F). In this case, the constant symptoms model predicted 35%  
265 fewer cases than the variable symptoms model (Fig 3F). Since the total number of  
266 cases in this epidemic was so large, this corresponded to 641 cases difference between  
267 the forecasts of the two models.

268  
269 We also considered the robustness of our results to the values of the model  
270 parameters, including the level of surveillance assumed when fitting to data and the  
271 extent to which surveillance was intensified in the models (Figs S1-S7). In addition, we  
272 considered different values of the detection probability whenever surveillance occurs  
273 (Figs S8 and S9). In each case, we found qualitatively identical results – both the  
274 constant symptoms and variable symptoms models could reproduce epidemic time  
275 series data, but when interventions were changed in the models the predicted epidemic  
276 dynamics then differed. As well as considering an intensification of surveillance, we also  
277 examined cases in which surveillance was relaxed (e.g. Figs S4B and S4C). Whenever  
278 surveillance was intensified, the constant symptoms model underestimated the total  
279 number of cases compared to the more realistic variable symptoms model. However,  
280 when surveillance was instead reduced, the constant symptoms model led to  
281 overestimation of the total number of cases.

282  
283 We also considered the effect of enhancing surveillance at different times during the  
284 epidemic. In particular, we considered increasing the surveillance level once the  
285 epidemics had already been in progress until a certain date, for different possible dates  
286 of surveillance intensification. The earlier that surveillance was intensified, the larger the  
287 error when using the constant symptoms model rather than the more biologically  
288 realistic variable symptoms model, since early surveillance intensification then allows  
289 more time for model predictions to differ (Figs 4 and S10).

290

291 Until this point, so that we could isolate the effect of variable symptoms alone on the  
292 predicted outcomes of interventions, we assumed that at any time during an epidemic  
293 all infected and uncontrolled hosts generated new infections at a constant rate.  
294 However, we also conducted an analysis in which the infection rate also varied  
295 throughout the course of an Ebola infection, by considering cases in which  
296 infectiousness was either correlated with or correlated against the level of symptom  
297 expression (Fig 5 and Supplementary Material). In cases in which higher levels of  
298 symptoms were associated with reduced infectiousness – for example due to a lower  
299 level of mixing in the population compared to hosts with less serious symptoms – our  
300 result that predictions are different between the constant symptoms and variable  
301 symptoms models was enhanced (Figs 5B and 5D).  
302

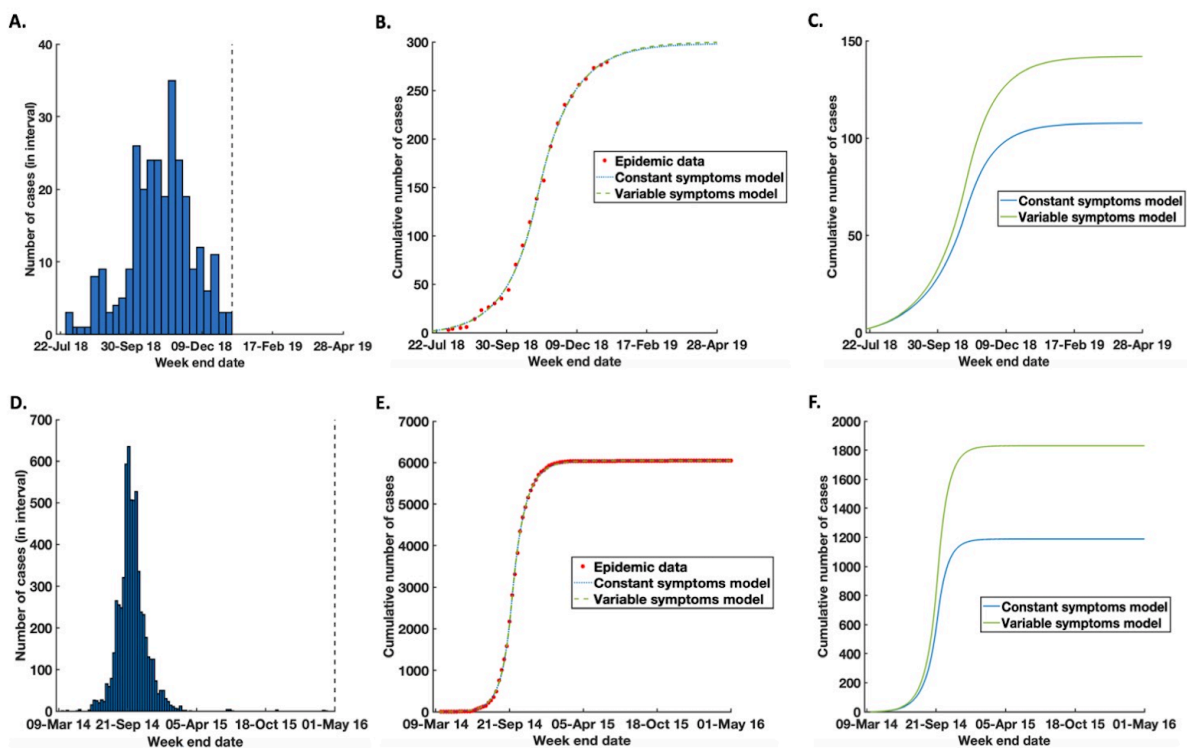

303  
304 Figure 3. Using the constant symptoms model and variable symptoms model to predict alternative  
305 interventions. A. Number of cases each week in Beni and Kalunguta health zones in the Democratic  
306 Republic of Congo. The dotted black vertical line represents the time before which data were available. B.  
307 Model fits to the data (red stars), using the constant symptoms model (blue dotted) and variable symptoms  
308 model (green dash) C. Predictions of the effect of intensified surveillance, using the constant symptoms

309 model (blue) and variable symptoms model (green). D-F. Equivalent figures to A-C, using the data from the  
310 2014-16 Ebola epidemic in Liberia. For model parameters, see Methods and Tables 1 and 2.  
311

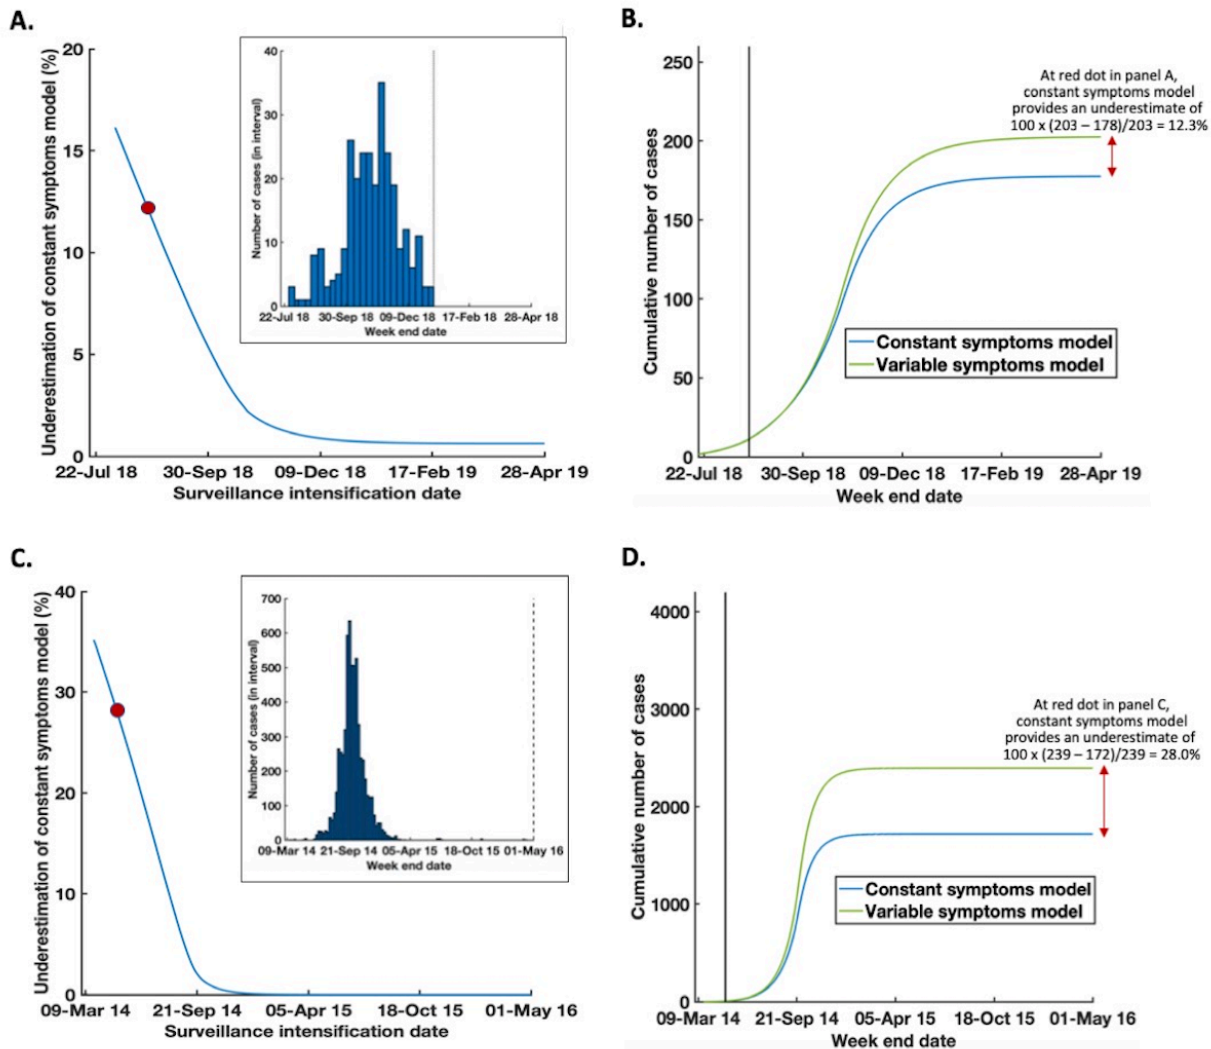

312  
313 Figure 4. Using the constant symptoms model and variable symptoms model to predict alternative  
314 interventions, for different times of surveillance intensification. A. Reduction in the total number of cases  
315 predicted by the constant symptoms model compared to the variable symptoms model, expressed as a  
316 percentage of the number of cases predicted by the variable symptoms model, for different times of  
317 surveillance intensification. The models were fitted to data from the ongoing epidemic in the Democratic  
318 Republic of Congo. B. Illustration of how the values in panel A were calculated. In the graph shown,  
319 intensified surveillance began on 23<sup>rd</sup> August 2018 in the models fitted to the ongoing epidemic in the  
320 Democratic Republic of Congo. This corresponds to the time denoted by the red dot in panel A. C-D.  
321 Equivalent panels to A-B, for the 2014-16 Ebola epidemic in Liberia. In panel D, intensified surveillance  
322 began on 2<sup>nd</sup> May 2014. In panels A and C, we only consider intensifying surveillance at or after the time

323 that the first cases were observed (i.e. 3<sup>rd</sup> August 2018 for the ongoing epidemic in the Democratic Republic  
324 of Congo, and 23<sup>rd</sup> March 2014 for the 2014-16 Liberia epidemic). The original epidemic datasets are shown  
325 as insets to panels A and C. For model parameters, see Supplementary Material and Tables 1 and 2.  
326  
327

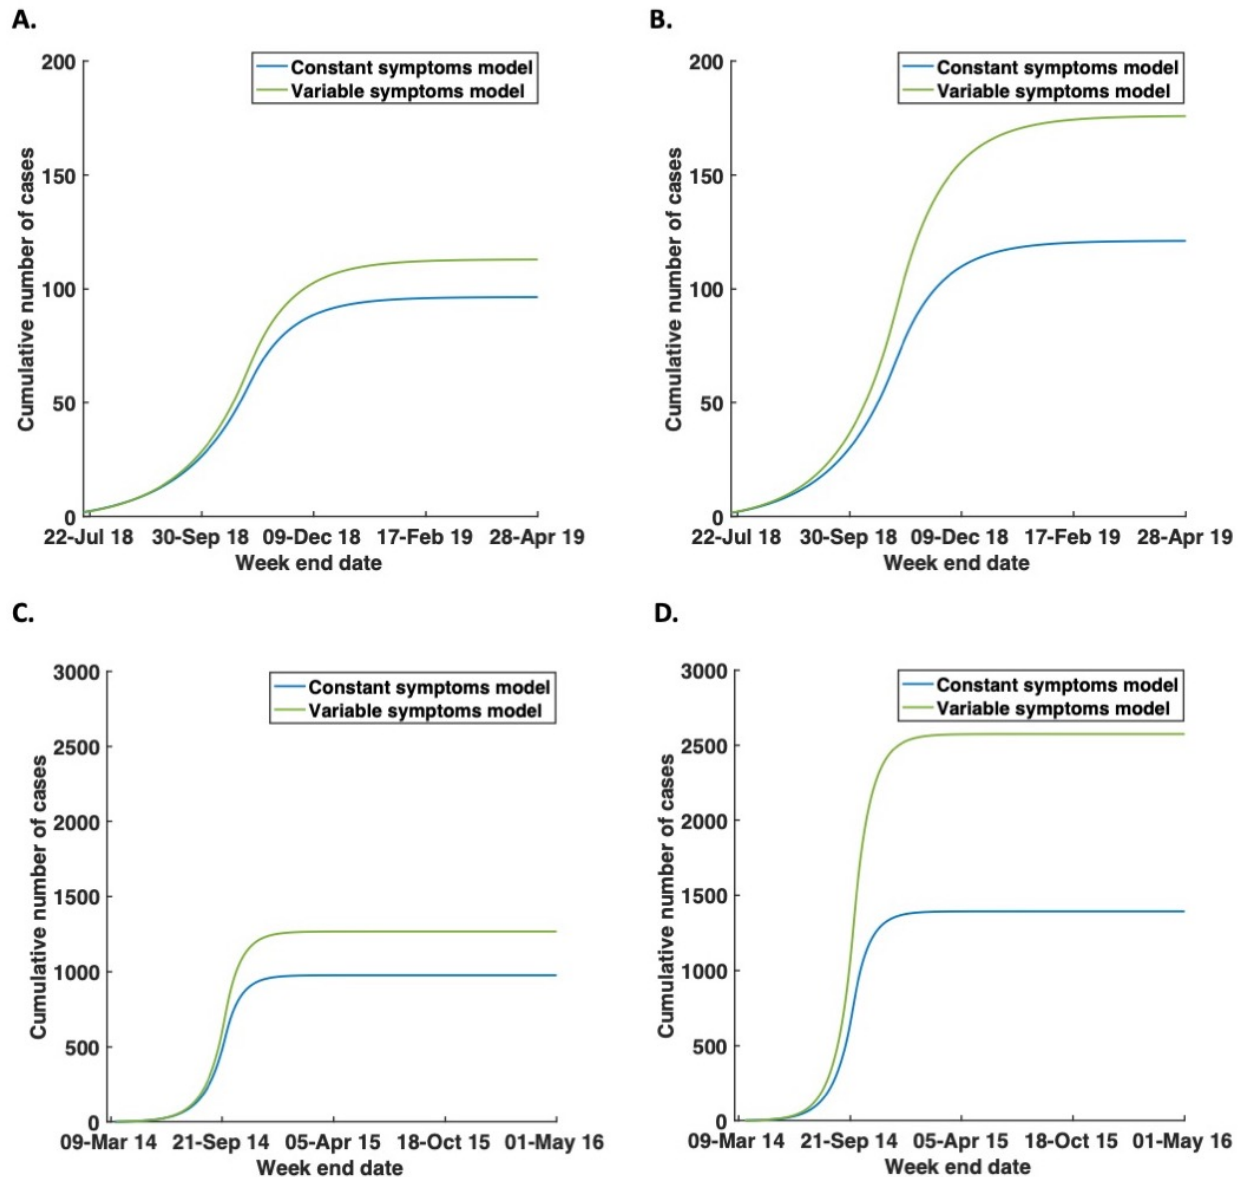

328  
329 Figure 5. Using the constant symptoms model and variable symptoms model to predict alternative  
330 interventions, if infectiousness is also assumed to depend on the stage of infection. A. Predictions of the  
331 effect of intensified surveillance using the constant symptoms model (blue) and variable symptoms model  
332 (green), fitted to data from the ongoing epidemic in the Democratic Republic of Congo and assuming that  
333 infectiousness increases during an Ebola infection as described in the Supplementary Material. B.  
334 Predictions of the effect of intensified surveillance using the constant symptoms model (blue) and variable



335 symptoms model (green), fitted to data from the ongoing epidemic in the Democratic Republic of Congo  
336 and assuming that infectiousness decreases during an Ebola infection as described in the Supplementary  
337 Material. C-D. Equivalent figures to A-B but fitted to data from the 2014-16 Ebola epidemic in Liberia. The  
338 values of parameters other than the fitted parameters (i.e. the infection rates, the start times of the  
339 epidemics and the times at which the infection rates change), are identical to those described in Tables 1  
340 and 2. Surveillance intensification is assumed to occur at the beginning of the epidemic. Model fits are not  
341 shown, since they appear identical by eye to those in Figs 3B and 3E.

342

343

#### 4. DISCUSSION

344 Epidemiological models that have been fitted to data are often used to predict the  
345 dynamics of an epidemic under different control interventions (e.g. [21–25]). However,  
346 most models considering interventions targeted at symptomatic hosts assume that  
347 those hosts display a constant level of symptoms that does not change during the  
348 course of infection. For a number of infectious diseases, however – including Ebola  
349 virus disease – there are different stages of an infection, and in each of these stages  
350 the level of symptoms is likely to be different. Individuals in early infection tend to have  
351 milder symptoms than those in later infection. As a result, symptomatic hosts in early  
352 infection are less likely to have appeared in the surveillance data that are routinely  
353 collected during an epidemic than those in later infection, who not only have had a  
354 longer period during which to be detected but are also likely to have developed more  
355 severe and recognisable symptoms.

356

357 Here, we have considered Ebola virus disease as a case study, and used two models to  
358 predict the possible effects on the dynamics of two epidemics under different  
359 surveillance levels. We assumed that increased surveillance leads to improved  
360 detection and control of symptomatic hosts. We compared the output of a model in  
361 which, if an individual is surveyed, the probability of detection is constant at each time  
362 during the infectious period (the constant symptoms model) to the equivalent predictions  
363 from a model in which the probability of detection increases throughout infection (the  
364 variable symptoms model). We found that both these models can be fitted closely to  
365 data from Ebola epidemics (Figs 3B and 3E). However, when the level of surveillance in  
366 the models is increased, we found that the more epidemiologically realistic variable

367 symptoms model predicted a smaller number of cases (e.g. Figs 3C and 3F). Thus, it  
368 might be important to use the more realistic model to assess the quantitative effects of  
369 interventions aimed at reducing the impacts of Ebola epidemics.

370

371 Variations in symptoms between different stages of infection, as well as the signature of  
372 such variable symptoms in those types of data that are collected during an epidemic,  
373 have to date received little attention. Until now, the impact of variable symptoms on  
374 predictions of models used for testing Ebola interventions has never been rigorously  
375 assessed. However, our approach of splitting the infectious and symptomatic period into  
376 different compartments was inspired by the so-called “method of stages” [18,26], a  
377 technique most often used to model gamma distributed epidemiological periods  
378 [11,27,28]. Within that framework, varying infectiousness – rather than symptoms – over  
379 the course of infection has been considered previously. For example, Cunniffe *et al.* [19]  
380 consider a model of plant disease epidemics in which the rate of sporulation (production  
381 of viable spores by each infected host) is a function of the time since infection, and  
382 implement this in an SEIR model by splitting the *E* and *I* classes into compartments and  
383 assigning different infection rates to hosts in the different *I* classes. A similar modelling  
384 framework could be adopted in our work, using a large number of compartments so that  
385 the level of symptoms is represented by a continuous curve (rather than being at  
386 constant levels within the different stages of infection). However, we do not pursue this  
387 here, since discrete changes in symptom expression in each symptomatic host are  
388 sufficient to make our underlying point that accurate forecasts of the effects of Ebola  
389 interventions may require models that account for variations in symptoms.

390

391 To conduct our analyses, we sought to develop a simple model in which the level of  
392 symptoms increases during infection, and to compare the results from this model to  
393 those from the analogous model in which there is a constant level of symptoms during  
394 infection. Practical use of either model during an Ebola epidemic would require  
395 adjustment for the particular epidemic under consideration. For example, transmission  
396 in different settings could be included in a single model, such as spread in hospitals,  
397 community care centres, at funerals or in the wider community [3,4]. We modelled



398 detection and isolation of symptomatic hosts here, but other interventions such as  
399 vaccination could be modelled explicitly [29]. If an Ebola vaccine is not perfectly  
400 effective, as has been suggested for the vaccine used in the ongoing Ebola epidemic  
401 [30], the possibility that vaccination might mask symptoms while not completely  
402 stopping infectiousness could be included in our approach. A model that includes spatial  
403 spread of the pathogen or transmission through social contact networks might be  
404 required to replicate observed data [31,32], or different geographical areas could be  
405 considered separately [2,4]. To demonstrate the principle that variable symptoms can  
406 affect predictions of the effects of interventions, we assumed that all infected individuals  
407 pass through three stages of an Ebola infection (from non-specific symptoms, to a  
408 gastrointestinal phase and then to a deterioration phase), whereas in reality some hosts  
409 might recover rather than passing to the deterioration phase [14]. At the cost of an  
410 additional parameter to be estimated, it would be straightforward to include this in a  
411 compartmental epidemiological model (see preliminary analysis in Supplementary  
412 Material and Fig S11, in which some hosts recover rather than passing to the final stage  
413 of infection). We also modelled surveillance in a simple fashion, by assuming that hosts  
414 are surveyed on average at periodic intervals and that there is a particular probability of  
415 detection whenever a host is surveyed. For forecasting, it would be necessary to  
416 consider the wide range of different surveillance approaches used in practice including  
417 contact tracing from known cases [33] and rural village visitations to detect cases in  
418 locations where access to healthcare is limited [34], as well as disruptions to  
419 surveillance caused by factors including armed conflict [35].

420  
421 We parameterised our models using the simplest possible approach – namely fitting the  
422 numbers of detected or removed individuals in the relevant classes of the models to  
423 data on the cumulative numbers of symptomatic cases using least squares estimation.  
424 We did not quantify the uncertainty in estimates of the values of model parameters,  
425 since the precise method of parameter inference was not central to our message.  
426 Instead, we sought to use the simplest possible fitting method. While this approach is  
427 used frequently during epidemics due to its ability to produce quick forecasts [5,36,37],

428 to properly quantify the uncertainty in forward projections it would be necessary to use  
429 non-cumulative incidence data and fit stochastic transmission models [38].

430

431 One advantage of the models that we used is that the surveillance level is assumed to  
432 impact on the epidemiological dynamics themselves, rather than simply the observed  
433 dynamics. This is not always the case in epidemiological models: a common method for  
434 accounting for under-reporting is simply to scale the incidence data up [39], thereby  
435 assuming a fixed percentage of infectious cases are detected with no impact on the  
436 numbers of cases generated by those individuals. Another approach is to assume that  
437 some individuals in the infectious class are unobserved [40]. In reality, detected hosts  
438 have a lower probability of transmitting the pathogen than undetected hosts due to the  
439 higher chance that those individuals are subject to interventions, and our models reflect  
440 this.

441

442 Here, we considered a control strategy of detection and isolation under different  
443 surveillance levels. The effects of including variable symptoms in models of other  
444 intervention strategies should be tested, to see whether it is always necessary to  
445 account for changing levels of symptoms throughout infection. We note that including  
446 additional epidemiological detail in forecasting models does not always improve  
447 predictions [12]. Simple models are easier to parameterise and interpret than more  
448 complex models, and so modellers should consider carefully, in each study, whether or  
449 not including variable symptoms will change model predictions. We also note that, in  
450 theory, it might be possible to deploy commonly used epidemiological models with  
451 altered parameter values as a proxy for explicit consideration of variable symptoms [41].  
452 For example, if the chance of detection in early infection is low, then early non-specific  
453 symptoms could be considered as part of the incubation period. In that case, care  
454 should be taken when “lifting” the values of model parameters directly from the clinical  
455 literature, to ensure that the definitions of parameters in the model match those in the  
456 original studies.

457

458 In summary, including different levels of symptoms at different stages of infection in  
459 epidemiological models can alter predictions of the effects of intervention strategies  
460 compared to assuming a fixed level of symptoms. If variations in symptoms during  
461 infection – and their impacts on detectability – can be well characterised by  
462 epidemiologists and then included in predictive tools by modellers, decision makers will  
463 be able to make more informed choices as to which particular intervention, or  
464 combination of interventions, to pursue.

465

## 466 REFERENCES

467

- 468 1. World Health Organization. Ebola virus disease - Democratic Republic of the  
469 Congo [Internet]. 2019 p. <https://www.who.int/csr/don/17-january-2019-ebola->
- 470 2. WHO Ebola Response Team. Ebola virus disease in west Africa — The first 9  
471 months of the epidemic and forward projections. *N Engl J Med*. 2014;371: 1481–  
472 1495. doi:10.15678/EBER.2017.050110
- 473 3. Camacho A, Kucharski A, Aki-Sawyer Y, White MA, Flasche S, Baguelin M, et al.  
474 Temporal changes in Ebola transmission in Sierra Leone and implications for  
475 control requirements: A real-time modelling study. *PLoS Curr*. 2015;7: 1–12.  
476 doi:10.1371/currents.outbreaks.406ae55e83ec0b5193e3085
- 477 4. Meakin SR, Tildesley MJ, Davis E, Keeling MJ. A metapopulation model for the  
478 2018 Ebola outbreak in Equateur province in the Democratic Republic of the  
479 Congo. *bioRxiv*. 2018; 1–30.
- 480 5. Chowell G, Hengartner NW, Castillo-Chavez C, Fenimore PW, Hyman JM. The  
481 basic reproductive number of Ebola and the effects of public health measures:  
482 The cases of Congo and Uganda. *J Theor Biol*. 2004;229: 119–126.  
483 doi:10.1016/j.jtbi.2004.03.006
- 484 6. Althaus CL. Estimating the reproduction number of Ebola virus (EBOV) during the  
485 2014 outbreak in West Africa. *PLoS Curr*. 2014;6.  
486 doi:10.1371/currents.outbreaks.91afb5e0f279e7f29e7056095255b288
- 487 7. Nishiura H, Chowell G. Transmission dynamics and control of Ebola virus disease:  
488 a review. *BMC Med*. 2014;12: 196. Available:

- 489 <http://www.biomedcentral.com/content/pdf/s12916-014-0196-0.pdf>
- 490 8. Augusto FB, Teboh-Ewungkem MI, Gumel AB. Mathematical assessment of the  
491 effect of traditional beliefs and customs on the transmission dynamics of the 2014  
492 Ebola outbreaks. *BMC Med.* 2015;13: 1–17. doi:10.1186/s12916-015-0318-3
- 493 9. Barbarossa MV, Dénes A, Kiss G, Nakata Y, Röst G, Vizi Z. Transmission  
494 dynamics and final epidemic size of Ebola virus disease outbreaks with varying  
495 interventions. *PLoS One.* 2015;10: 1–21. doi:10.1371/journal.pone.0131398
- 496 10. Weitz JS, Dushoff J. Modeling post-death transmission of Ebola: Challenges for  
497 inference and opportunities for control. *Sci Rep.* 2015;5: 8751.
- 498 11. Thompson RN, Gilligan CA, Cunniffe NJ. Detecting Presymptomatic Infection Is  
499 Necessary to Forecast Major Epidemics in the Earliest Stages of Infectious  
500 Disease Outbreaks. *PLoS Comput Biol.* 2016;12.  
501 doi:10.1371/journal.pcbi.1004836
- 502 12. Thompson RN, Hart WS. Effect of confusing symptoms and infectiousness on  
503 forecasting and control of ebola outbreaks. *Clin Infect Dis.* 2018;67.  
504 doi:10.1093/cid/ciy248
- 505 13. Chowell D, Castillo-Chavez C, Krishna S, Qiu X, Anderson KS. Modelling the  
506 effect of early detection of Ebola. *Lancet Infect Dis.* 2015;15: 148–149.  
507 doi:10.1371/currents.outbreaks.9e4c4294ec8ce1adad2831
- 508 14. Beeching NJ, French M, Houlihan CF. Ebola virus disease. *Brit Med J.* 2014;349:  
509 26–30. doi:10.1155/2014/527378
- 510 15. Keeling MJ, Rohani P. Modeling infectious diseases in humans and animals.  
511 Princeton University Press; 2011.
- 512 16. World Health Organization. Disease outbreak news (DONs) on the Ebola  
513 outbreak in Democratic Republic of the Congo [Internet]. 2019 p.  
514 <https://www.who.int/ebola/situation-reports/drc-20>.
- 515 17. World Health Organization. Ebola data and statistics [Internet]. 2016 p.  
516 <http://apps.who.int/gho/data/view.ebola-sitrep.ebo>.
- 517 18. Wearing HJ, Rohani P, Keeling MJ. Appropriate models for the management of  
518 infectious diseases. *PLoS Med.* 2005;2: 0621–0627.  
519 doi:10.1371/journal.pmed.0020174

- 520 19. Cunniffe NJ, Stutt ROJH, Bosch F van den, Gilligan CA. Time-dependent  
521 infectivity and flexible latent and infectious periods in compartmental models of  
522 plant disease. *Phytopathology*. 2012;102: 365–380.
- 523 20. Cunniffe NJ, Laranjeira FF, Neri FM, DeSimone RE, Gilligan CA. Cost-effective  
524 control of plant disease when epidemiological knowledge is incomplete: Modelling  
525 Bahia bark scaling of citrus. *PLoS Comput Biol*. 2014;10: e1003753.  
526 doi:10.1371/journal.pcbi.1003753
- 527 21. Ferguson NM, Donnelly CA, Anderson RM. The foot-and-mouth epidemic in Great  
528 Britain: Pattern of spread and impact of interventions. 2014;1155.  
529 doi:10.1126/science.1061020
- 530 22. Merler S, Marco A, Fumanelli L, Gomes MFC, Pastore y Piontti A, Luca Rossi L,  
531 et al. Spatio-temporal spread of the Ebola 2014 outbreak in Liberia and the  
532 effectiveness of nonpharmaceutical interventions: a computational modelling  
533 analysis. *Lancet Infect Dis*. 2014;15. doi:10.1016/S1473-3099(14)71074-6
- 534 23. Brooks-Pollock E, Roberts GO, Keeling MJ. A dynamic model of bovine  
535 tuberculosis spread and control in Great Britain. *Nature*. 2014;511: 228–231.  
536 doi:10.1038/nature13529
- 537 24. Kucharski AJ, Camacho A, Flasche S, Glover RE, Edmunds WJ, Funk S.  
538 Measuring the impact of Ebola control measures in Sierra Leone. *Proc Natl Acad  
539 Sci U S A*. 2015;112: 14366–14371. doi:10.1073/pnas.1508814112
- 540 25. Cunniffe NJ, Cobb RC, Meentemeyer RK, Rizzo DM, Gilligan CA. Modeling when,  
541 where, and how to manage a forest epidemic, motivated by sudden oak death in  
542 California. *Proc Natl Acad Sci U S A*. 2016;113: 5640–5645.  
543 doi:10.1073/pnas.1602153113
- 544 26. Lloyd AL. Destabilization of epidemic models with the inclusion of realistic  
545 distributions of infectious periods. *R Soc London B Biol Sci*. 2001;268: 985–993.  
546 doi:10.1098/rspb.2001.1599
- 547 27. Anderson D, Watson R. On the spread of a disease with gamma distributed latent  
548 and infectious periods. *Biometrika*. 1980;67: 191–198.
- 549 28. Ma J, Earn DJD. Generality of the Final Size Formula for an Epidemic of a Newly  
550 Invading Infectious Disease. *Bull Math Biol*. 2006;68: 679–702.

- 551 doi:10.1007/s11538-005-9047-7
- 552 29. Fisman D, Tuite A. Projected impact of vaccination timing and dose availability on  
553 the course of the 2014 West African Ebola epidemic. *PLoS Curr.* 2014;6.
- 554 30. Metzger WG, Vivas-Martínez S. Questionable efficacy of the rVSV-ZEBOV Ebola  
555 vaccine. *Lancet.* 2018;391: 1021.
- 556 31. Kramer AM, Pulliam JT, Laura W, Park AW, Rohani P, Drake JM, et al. Spatial  
557 spread of the West Africa Ebola epidemic. *R Soc Open Sci.* 2016;3(8): 160294.
- 558 32. Kiskowski M, Chowell G. Modeling household and community transmission of  
559 Ebola virus disease: Epidemic growth, spatial dynamics and insights for epidemic  
560 control. *Virulence.* 2016;7: 163–173. doi:10.1080/21505594.2015.1076613
- 561 33. Pandey A, Atkins K E, Medlock J, Wenzel N, Townsend J P, Childs J E, et al.  
562 Strategies for containing Ebola in West Africa. *Science (80- ).* 2014;346: 991–995.
- 563 34. Namukose E, Bowah C, Cole I, Dahn G, Nyanzee P, Saye R, et al. Active Case  
564 Finding for Improved Ebola Virus Disease Case Detection in Nimba County ,  
565 Liberia , 2014 / 2015 : Lessons Learned. *Adv Public Heal.* 2018; 6753519.
- 566 35. Gostin LO, Kavanagh MM, Cameron E. Ebola and war in the Democratic Republic  
567 of Congo. *Jama.* 2018;321: 2018–2019. doi:10.1001/jama.2018.19743
- 568 36. Rivers C, Lofgren E, Marathe M, Eubank S, Lewis B. Modeling the impact of  
569 interventions on an epidemic of Ebola in Sierra Leone and Liberia. *PLoS Curr.*  
570 2014; 1–10. doi:10.1371/currents.outbreaks.fd38dd85078565450b0be3fcd78f5ccf
- 571 37. Webb G, Browne C, Huo X, Seydi O, Seydi M, Magal P. A model of the 2014  
572 ebola epidemic in West Africa with contact tracing. *PLoS Curr.* 2015;7: 1–7.  
573 doi:10.1371/currents.outbreaks.846b2a31ef37018b7d1126a9c8adf22a
- 574 38. King AA, De Cellés MD, Magpantay FMG, Rohani P. Avoidable errors in the  
575 modelling of outbreaks of emerging pathogens, with special reference to Ebola.  
576 *Proc R Soc B Biol Sci.* 2015;282: 0–6. doi:10.1098/rspb.2015.0347
- 577 39. Meltzer MI, Santibanez S, Knust B, Petersen BW, Ervin ED, Nichol ST, et al.  
578 Estimating the future number of cases in the Ebola epidemic - Liberia and Sierra  
579 Leone, 2014–2015. *MMWR Surveill Summ.* 2015;63: 1–14. Available:  
580 [http://www.cdc.gov/mmwr/preview/mmwrhtml/su6303a1.htm?s\\_cid=su6303a1\\_w](http://www.cdc.gov/mmwr/preview/mmwrhtml/su6303a1.htm?s_cid=su6303a1_w)
- 581 40. Thompson RN, Morgan OW, Jalava K. Rigorous surveillance is necessary for

582 high confidence in end-of-outbreak declarations for Ebola and other infectious  
 583 diseases. *Philos Trans R Soc B*. 2019; doi:10.1098/rstb.2018.0431  
 584 41. Fraser C, Riley S, Anderson RM, Ferguson NM. Factors that make an infectious  
 585 disease outbreak controllable. *Proc Natl Acad Sci U S A*. 2004;101: 6146–6151.  
 586 42. ReliefWeb. DRC (Nord Kivu) Ebola virus disease [Internet]. p.  
 587 <https://reliefweb.int/sites/reliefweb.int/files/re>.  
 588 43. World Bank. World Bank Open Data - Liberia [Internet]. p.  
 589 <https://data.worldbank.org/country/liberia>.  
 590  
 591  
 592

| Parameter              | Definition                       | Default Value                                                                                                                                 | Justification  |
|------------------------|----------------------------------|-----------------------------------------------------------------------------------------------------------------------------------------------|----------------|
| $N$                    | Population size                  | 230,000                                                                                                                                       | [42]           |
| $\beta_0$              | Infection rate early in epidemic | $8.43 \times 10^{-7} \text{ day}^{-1}$<br>(constant symptoms model)<br>or $8.1 \times 10^{-7} \text{ day}^{-1}$<br>(variable symptoms model)  | Fitted to data |
| $t_{\text{ay}}\beta_1$ | Infection rate late in epidemic  | $3.68 \times 10^{-7} \text{ day}^{-1}$<br>(constant symptoms model)<br>or $3.59 \times 10^{-7} \text{ day}^{-1}$<br>(variable symptoms model) | Fitted to data |
| $T$                    | Infection rate switch time       | 25 <sup>th</sup> October 2018<br>(constant symptoms model)<br>or 24 <sup>th</sup> October 2018<br>(variable symptoms model)                   | Fitted to data |



|            |                                             |                                                                                                                                      |                                                                             |
|------------|---------------------------------------------|--------------------------------------------------------------------------------------------------------------------------------------|-----------------------------------------------------------------------------|
| $1/\gamma$ | Latent/incubation period                    | 7 days                                                                                                                               | [4]                                                                         |
| $1/\mu$    | Infectious period                           | 9.8 days                                                                                                                             | [4]                                                                         |
| $p_1$      | Detection probability in early infection    | 0.6 (constant symptoms model) or 0.1 (variable symptoms model)                                                                       | Assumption (for analyses with different values, see Supplementary Material) |
| $p_2$      | Detection probability in mid infection      | 0.6 (constant symptoms model) or 0.8 (variable symptoms model)                                                                       | Assumption (for analyses with different values, see Supplementary Material) |
| $p_3$      | Detection probability in late infection     | 0.6 (constant symptoms model) or 0.9 (variable symptoms model)                                                                       | Assumption (for analyses with different values, see Supplementary Material) |
| $\Delta$   | Sampling frequency                          | 21 days (weak surveillance) or 14 days (intensified surveillance)                                                                    | Assumption (for analyses with different values, see Supplementary Material) |
| $\delta_1$ | Detection/isolation rate in early infection | $4.08 \times 10^{-2} \text{ day}^{-1}$ (constant symptoms model) or $5.01 \times 10^{-3} \text{ day}^{-1}$ (variable symptoms model) | Calculated using values of $p_1$ and $\Delta$ (see Methods)                 |



|            |                                            |                                                                                                                                               |                                                             |
|------------|--------------------------------------------|-----------------------------------------------------------------------------------------------------------------------------------------------|-------------------------------------------------------------|
| $\delta_2$ | Detection/isolation rate in mid infection  | $4.08 \times 10^{-2} \text{ day}^{-1}$<br>(constant symptoms model)<br>or $6.35 \times 10^{-2} \text{ day}^{-1}$<br>(variable symptoms model) | Calculated using values of $p_2$ and $\Delta$ (see Methods) |
| $\delta_3$ | Detection/isolation rate in late infection | $4.08 \times 10^{-2} \text{ day}^{-1}$<br>(constant symptoms model)<br>or $7.79 \times 10^{-2} \text{ day}^{-1}$<br>(variable symptoms model) | Calculated using values of $p_3$ and $\Delta$ (see Methods) |
| $T_0$      | Start date of epidemic                     | 25 <sup>th</sup> June 2018<br>(constant symptoms model and variable symptoms model)                                                           | Fitted to data                                              |

593 Table 1. Default parameter values used in our analysis of data from the ongoing  
594 Democratic Republic of Congo epidemic.

595

596

| Parameter | Definition                       | Default Value                                                                                                                                 | Justification                    |
|-----------|----------------------------------|-----------------------------------------------------------------------------------------------------------------------------------------------|----------------------------------|
| $N$       | Population size                  | 4,500,000                                                                                                                                     | 2015 estimate obtained from [43] |
| $\beta_0$ | Infection rate early in epidemic | $4.54 \times 10^{-8} \text{ day}^{-1}$<br>(constant symptoms model)<br>or $4.33 \times 10^{-8} \text{ day}^{-1}$<br>(variable symptoms model) | Fitted to data                   |

|            |                                          |                                                                                                                                            |                                                                             |
|------------|------------------------------------------|--------------------------------------------------------------------------------------------------------------------------------------------|-----------------------------------------------------------------------------|
| $\beta_1$  | Infection rate late in epidemic          | $1.89 \times 10^{-8} \text{ day}^{-1}$<br>(constant symptoms model)<br>or $1.81 \times 10^{-8} \text{ day}^{-1}$ (variable symptoms model) | Fitted to data                                                              |
| $T$        | Infection rate switch time               | 21 <sup>st</sup> September 2014 (constant symptoms model and variable symptoms model)                                                      | Fitted to data                                                              |
| $1/\gamma$ | Latent/incubation period                 | 7 days                                                                                                                                     | [4]                                                                         |
| $1/\mu$    | Infectious period                        | 9.8 days                                                                                                                                   | [4]                                                                         |
| $p_1$      | Detection probability in early infection | 0.6 (constant symptoms model)<br>or 0.1 (variable symptoms model)                                                                          | Assumption (for analyses with different values, see Supplementary Material) |
| $p_2$      | Detection probability in mid infection   | 0.6 (constant symptoms model)<br>or 0.8 (variable symptoms model)                                                                          | Assumption (for analyses with different values, see Supplementary Material) |
| $p_3$      | Detection probability in late infection  | 0.6 (constant symptoms model)<br>or 0.9 (variable symptoms model)                                                                          | Assumption (for analyses with different values, see Supplementary Material) |
| $\Delta$   | Sampling frequency                       | 21 days (weak surveillance) or 14                                                                                                          | Assumption                                                                  |

|            |                                             |                                                                                                                                               |                                                                  |
|------------|---------------------------------------------|-----------------------------------------------------------------------------------------------------------------------------------------------|------------------------------------------------------------------|
|            |                                             | days (intensified surveillance)                                                                                                               | (for analyses with different values, see Supplementary Material) |
| $\delta_1$ | Detection/isolation rate in early infection | $4.08 \times 10^{-2} \text{ day}^{-1}$<br>(constant symptoms model)<br>or $5.01 \times 10^{-3} \text{ day}^{-1}$<br>(variable symptoms model) | Calculated using values of $p_1$ and $\Delta$ (see Methods)      |
| $\delta_2$ | Detection/isolation rate in mid infection   | $4.08 \times 10^{-2} \text{ day}^{-1}$<br>(constant symptoms model)<br>or $6.35 \times 10^{-2} \text{ day}^{-1}$<br>(variable symptoms model) | Calculated using values of $p_2$ and $\Delta$ (see Methods)      |
| $\delta_3$ | Detection/isolation rate in late infection  | $4.08 \times 10^{-2} \text{ day}^{-1}$<br>(constant symptoms model)<br>or $7.79 \times 10^{-2} \text{ day}^{-1}$<br>(variable symptoms model) | Calculated using values of $p_3$ and $\Delta$ (see Methods)      |
| $T_0$      | Start date of epidemic                      | 21 <sup>st</sup> March 2014<br>(constant symptoms model)<br>or 19 <sup>th</sup> March 2014<br>(variable symptoms model)                       | Fitted to data                                                   |

597 Table 2. Default parameter values used in our analysis of data from the 2014-16  
598 epidemic in Liberia.

599

600 **DATA AVAILABILITY**

601 The data used in our analyses are available in the supplementary files DataS1.csv and  
602 DataS2.csv. Analyses were performed in Matlab. Code is available for running the  
603 models, and is accessible at <https://github.com/will-s-hart/EbolaVariableSymptoms>.

604

605 **COMPETING INTERESTS**

606 We have no competing interests.

607

608 **AUTHORS' CONTRIBUTIONS**

609 RNT conceived the research; All authors designed the study; RNT, LFRH and WSH  
610 carried out the research; RNT and WSH drafted the manuscript; All authors revised the  
611 manuscript and gave final approval for publication.

612

613 **FUNDING**

614 RNT was funded by a Junior Research Fellowship from Christ Church, Oxford, and a  
615 JSPS Postdoctoral Research Fellowship (short-term, grant PE18029). WSH was funded  
616 by an EPSRC Excellence Award for his doctoral studies. LH was funded by an EPSRC  
617 undergraduate vacation bursary.
